# Supplementary material for: Two New Quinochalcone C-Glycosides from the Florets of Carthamus tinctorius
Source: PubMed Central journal article supplement (PMC4200872; doi:10.3390/ijms150916760), 2014-09-22

# Supplementary Information

Figure S1. IR spectrum of hydroxysafflor yellow B (1).

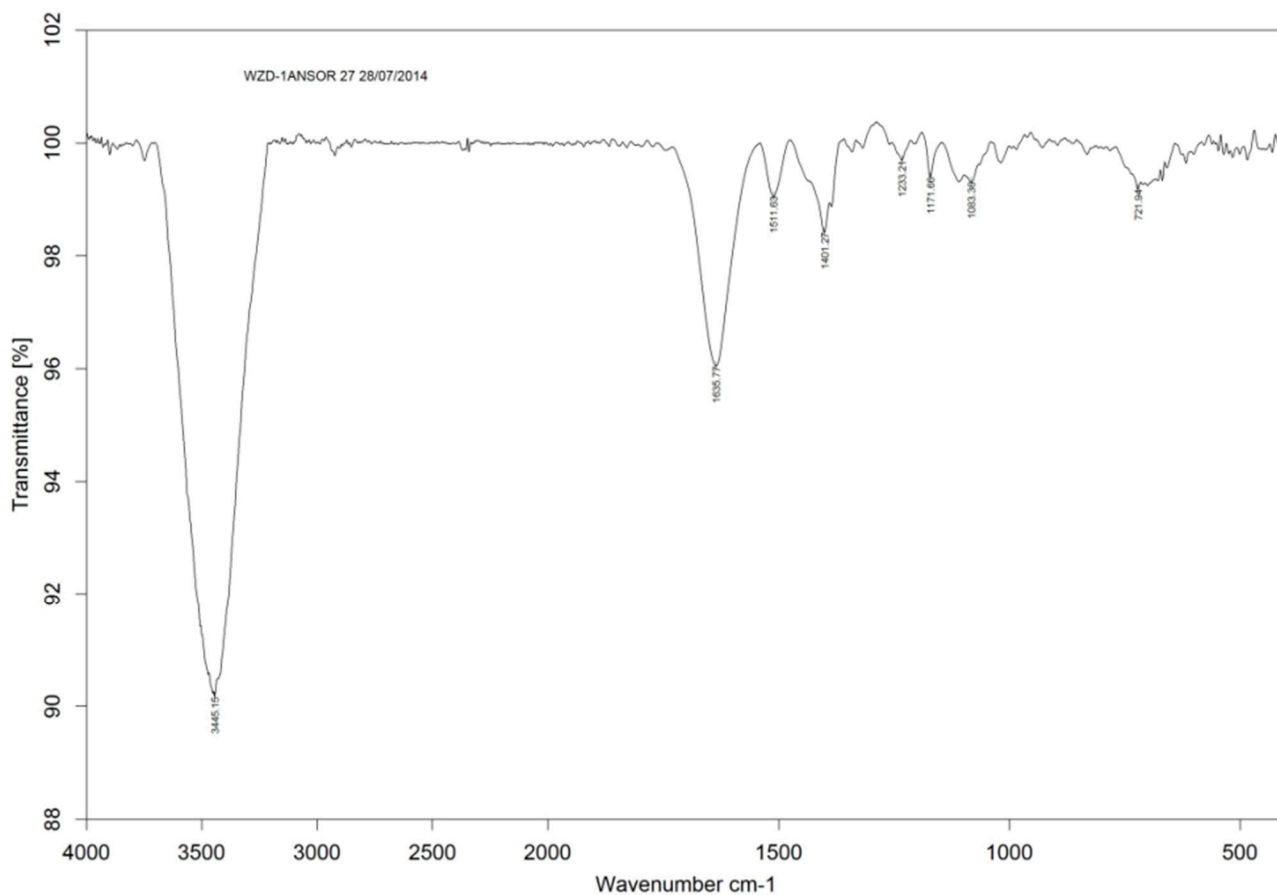

Figure S2. ESI spectrum of hydroxysafflor yellow B (1) in MeOH.

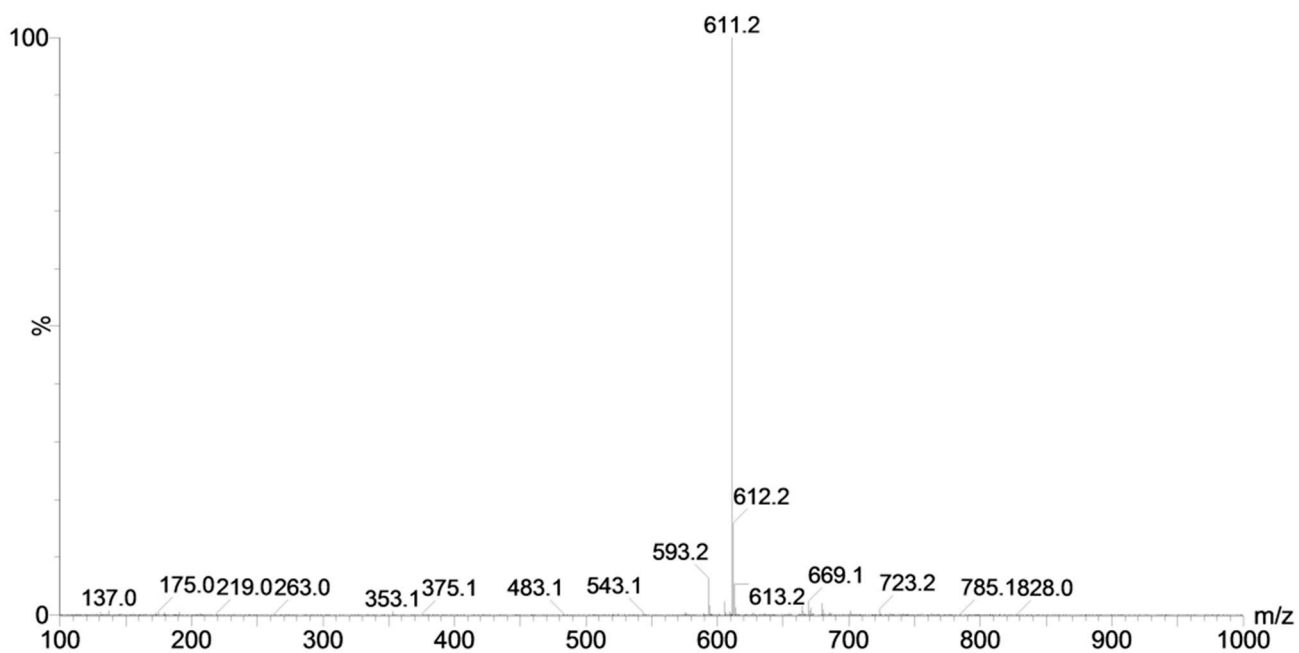

**Figure S3.** HRESIMS spectrum of hydroxysafflor yellow B (1) in MeOH.

Monoisotopic Mass, Odd and Even Electron Ions

186 formula(e) evaluated with 2 results within limits (up to 50 best isotopic matches for each mass)

Elements Used:

C: 0-500 H: 0-1000 O: 0-200

1

leshijun\_140812\_5 71 (2.176)

2: TOF MSMS 611.00ES-  
1.80e+002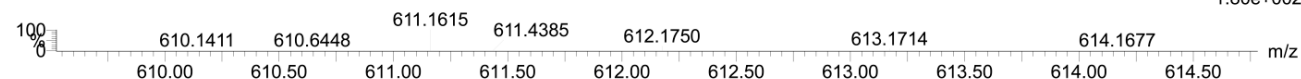

Minimum: 80.00  
Maximum: 100.00

| Mass     | RA     | Calc. Mass | mDa  | PPM  | DBE  | i-FIT | Norm  | Conf (%) | Formula     |
|----------|--------|------------|------|------|------|-------|-------|----------|-------------|
| 611.1615 | 100.00 | 611.1612   | 0.3  | 0.5  | 12.5 | 12.9  | 0.044 | 95.71    | C27 H31 O16 |
|          |        | 611.1647   | -3.2 | -5.2 | 34.5 | 16.0  | 3.150 | 4.29     | C45 H23 O3  |

**Figure S4.** <sup>1</sup>H-NMR spectrum of hydroxysafflor yellow B (1) in DMSO-*d*<sub>6</sub>.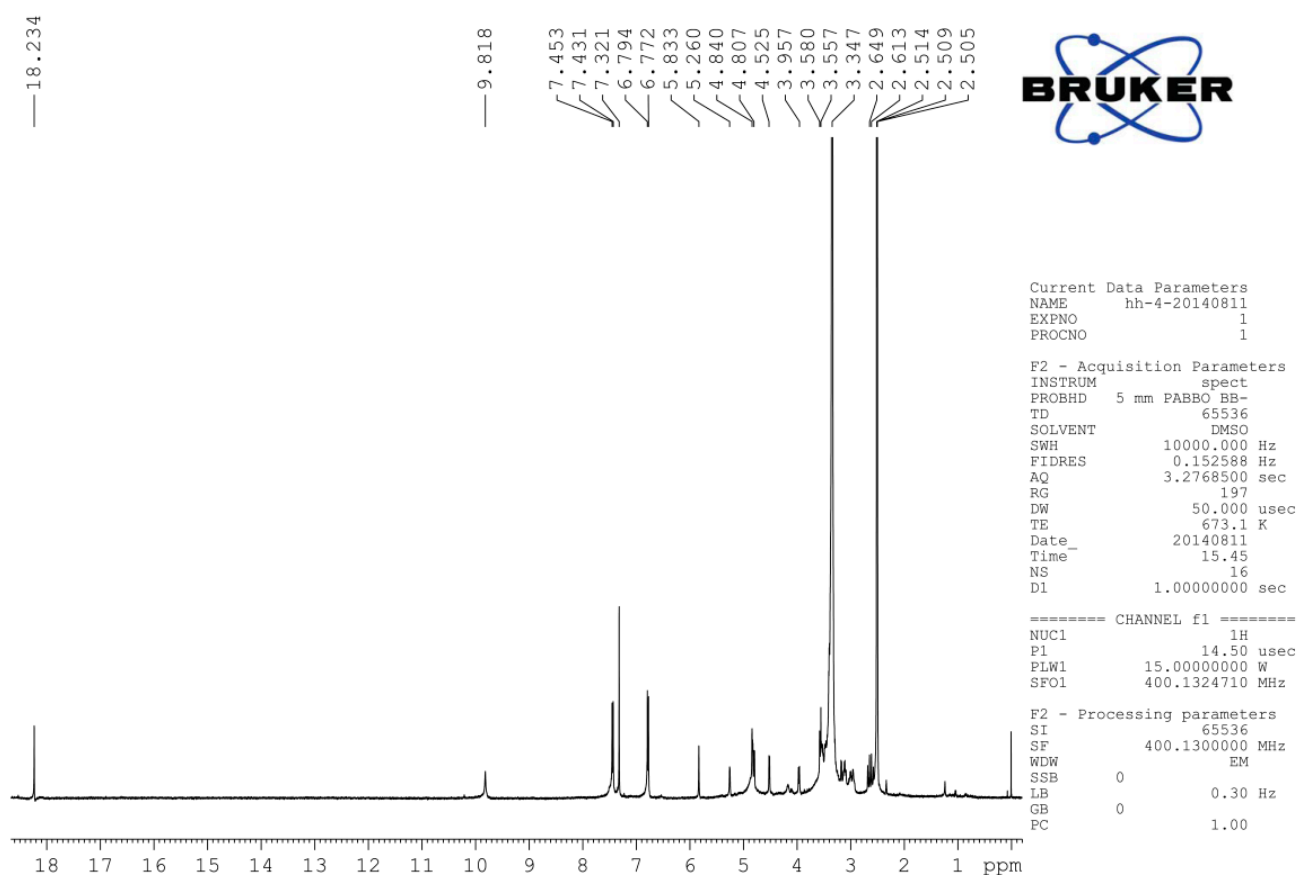

Figure S5.  $^1\text{H}$ -NMR spectrum of hydroxysafflor yellow B (1) in  $\text{D}_2\text{O}$ .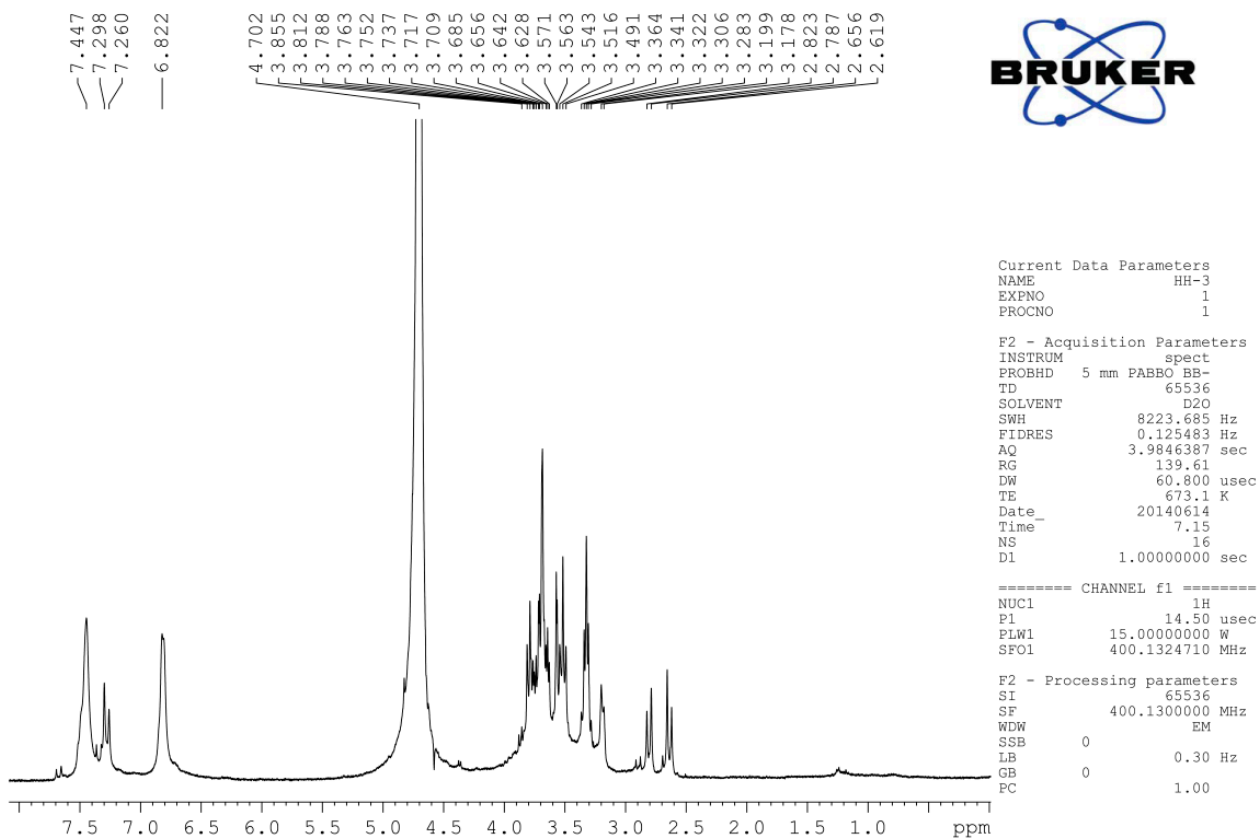Figure S6.  $^{13}\text{C}$ -NMR spectrum of hydroxysafflor yellow B (1) in  $\text{D}_2\text{O}$ .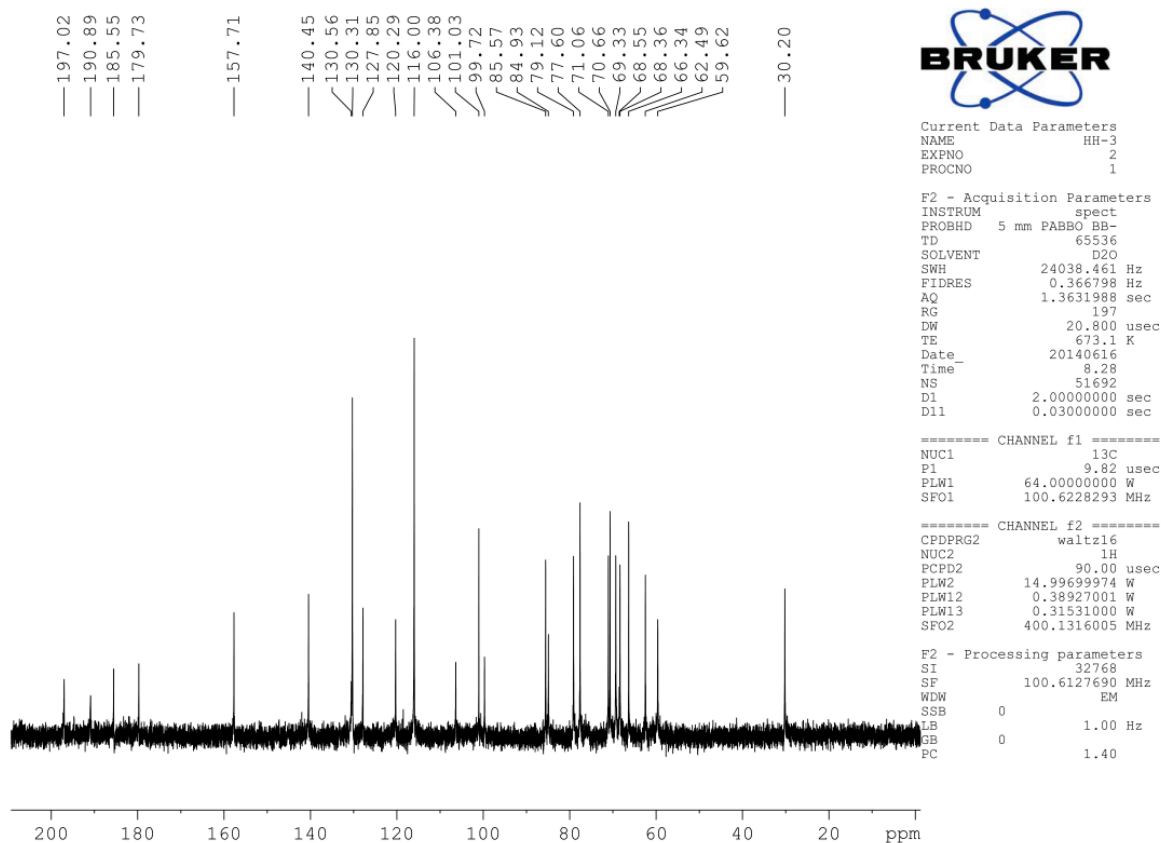

Figure S7. HSQC NMR spectrum of hydroxysafflor yellow B (1) in D<sub>2</sub>O.

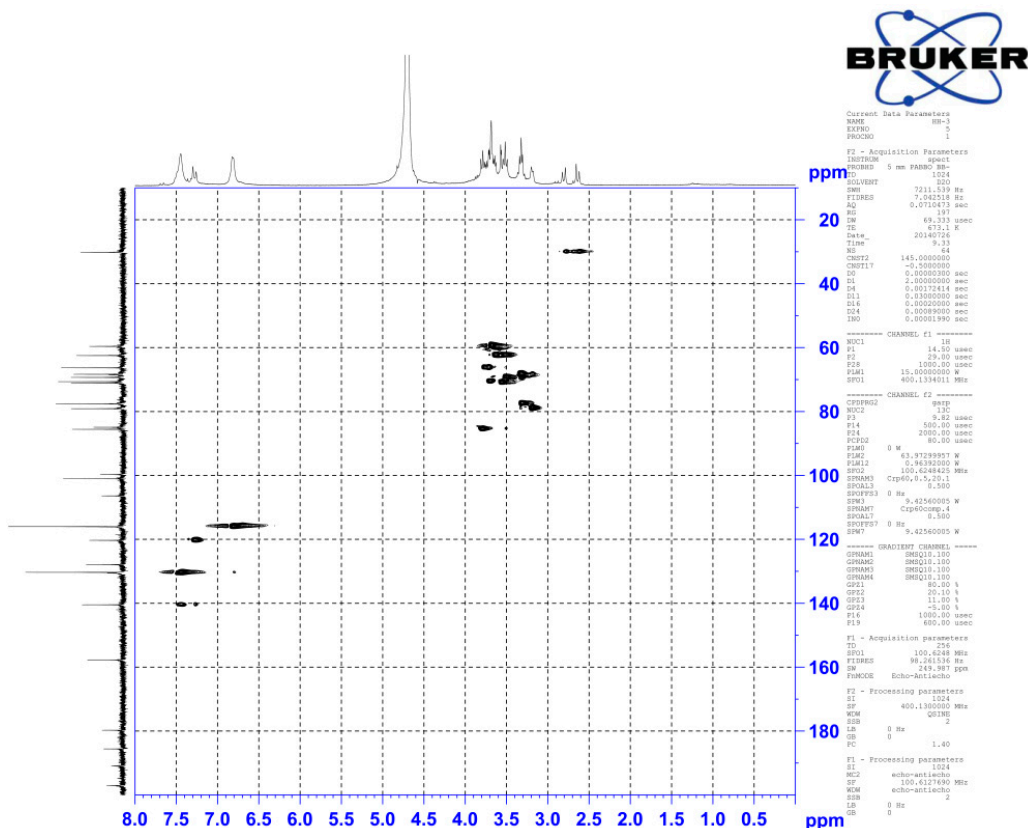

Figure S8. HMBC NMR spectrum of hydroxysafflor yellow B (1) in D<sub>2</sub>O.

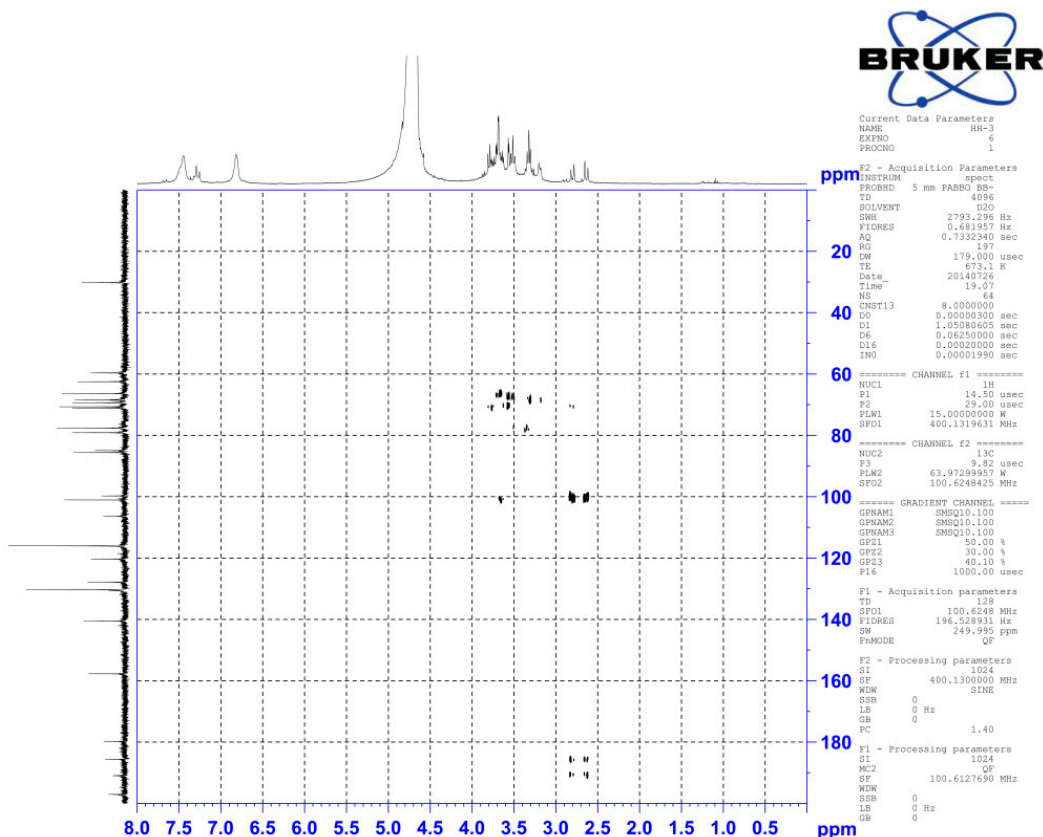

Figure S9. COSY NMR spectrum of hydroxysafflor yellow B (1) in D<sub>2</sub>O.

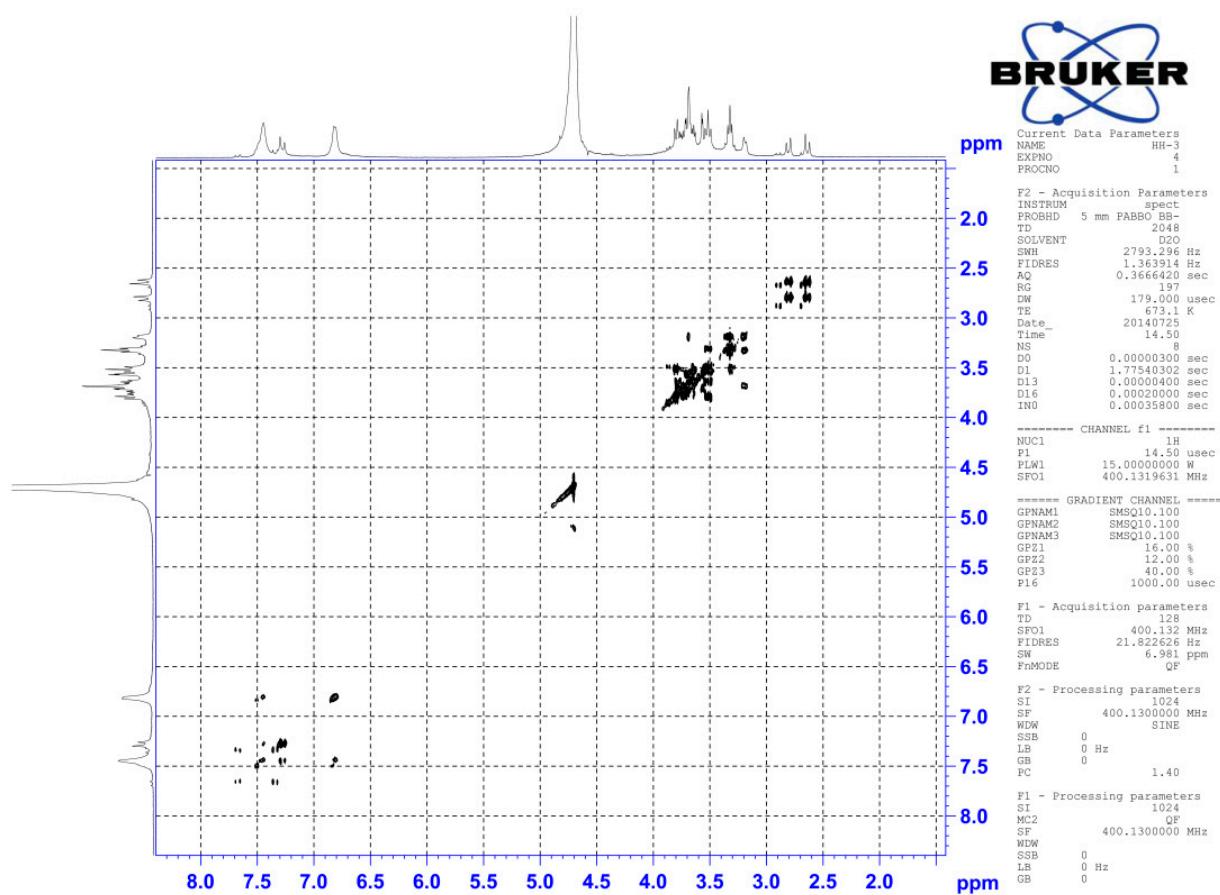

Figure S10. IR spectrum of hydroxysafflor yellow C (2)

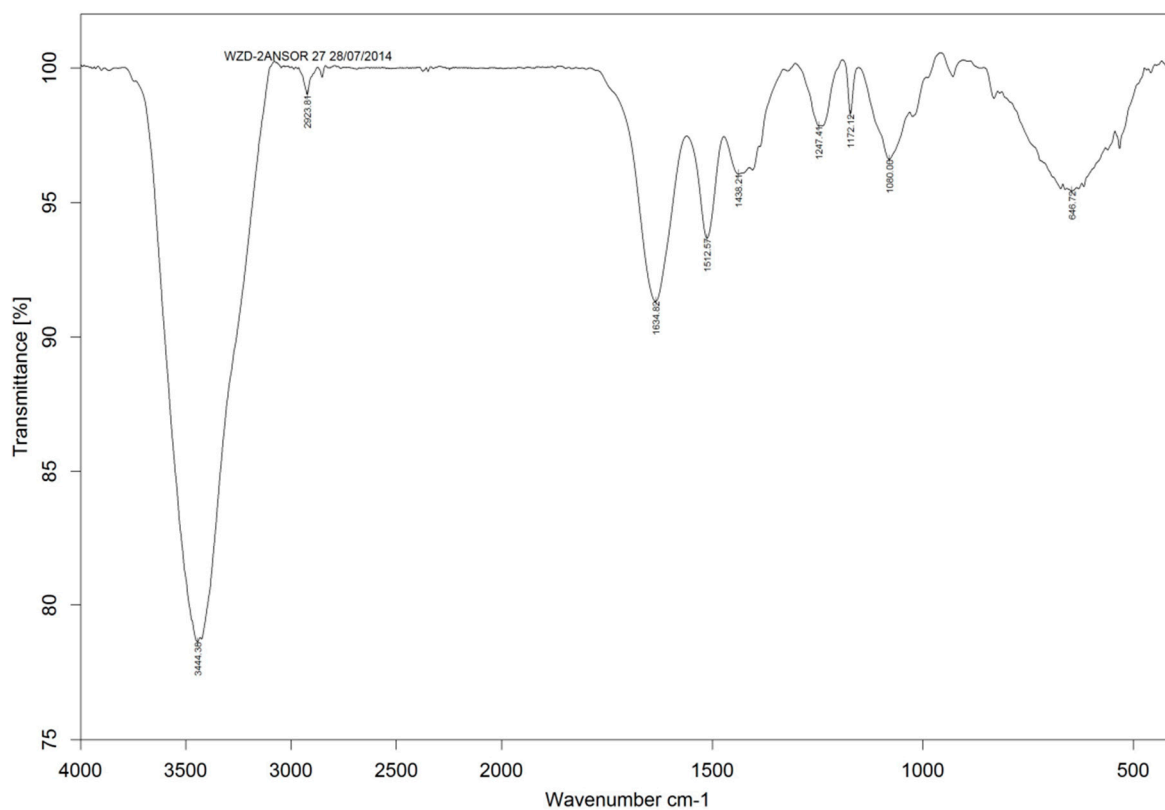

**Figure S11.** ESI spectrum of hydroxysafflor yellow C (2) in MeOH.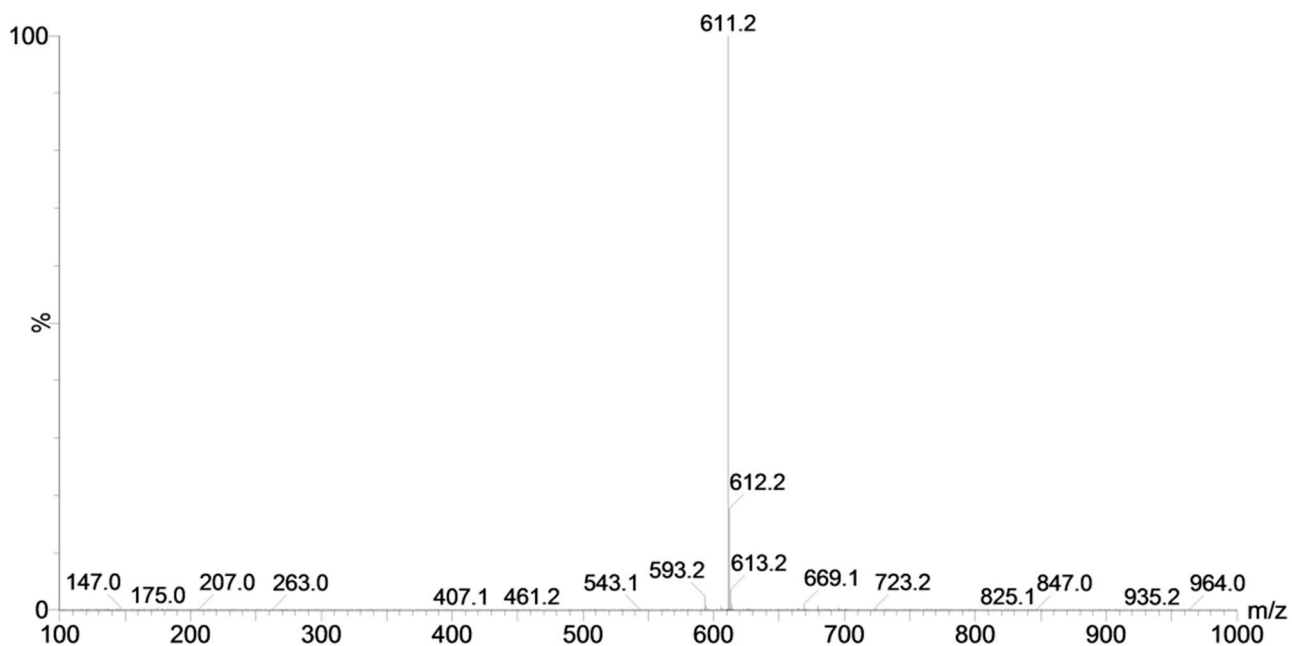**Figure S12.** HRESIMS spectrum of hydroxysafflor yellow C (2) in MeOH.

Monoisotopic Mass, Odd and Even Electron Ions

186 formula(e) evaluated with 3 results within limits (up to 50 best isotopic matches for each mass)

Elements Used:

C: 0-500 H: 0-1000 O: 0-200

2

leshijun\_140812\_6 70 (2.148)

2: TOF MSMS 611.00ES-  
8.90e+001

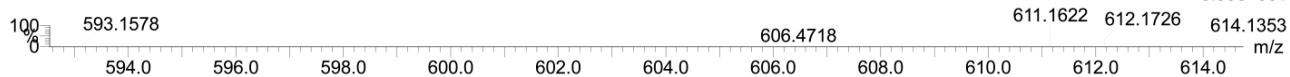

Minimum: 80.00 -1.5  
Maximum: 100.00 5.0 10.0 50.0

| Mass     | RA     | Calc. Mass | mDa  | PPM  | DBE  | i-FIT | Norm  | Conf (%) | Formula     |
|----------|--------|------------|------|------|------|-------|-------|----------|-------------|
| 611.1622 | 100.00 | 611.1612   | 1.0  | 1.6  | 12.5 | 10.0  | 0.716 | 48.88    | C27 H31 O16 |
|          |        | 611.1671   | -4.9 | -8.0 | 3.5  | 10.3  | 1.087 | 33.72    | C20 H35 O21 |
|          |        | 611.1647   | -2.5 | -4.1 | 34.5 | 11.0  | 1.748 | 17.41    | C45 H23 O3  |

Figure S13.  $^1\text{H-NMR}$  spectrum of hydroxysafflor yellow C (2) in  $\text{D}_2\text{O}$ .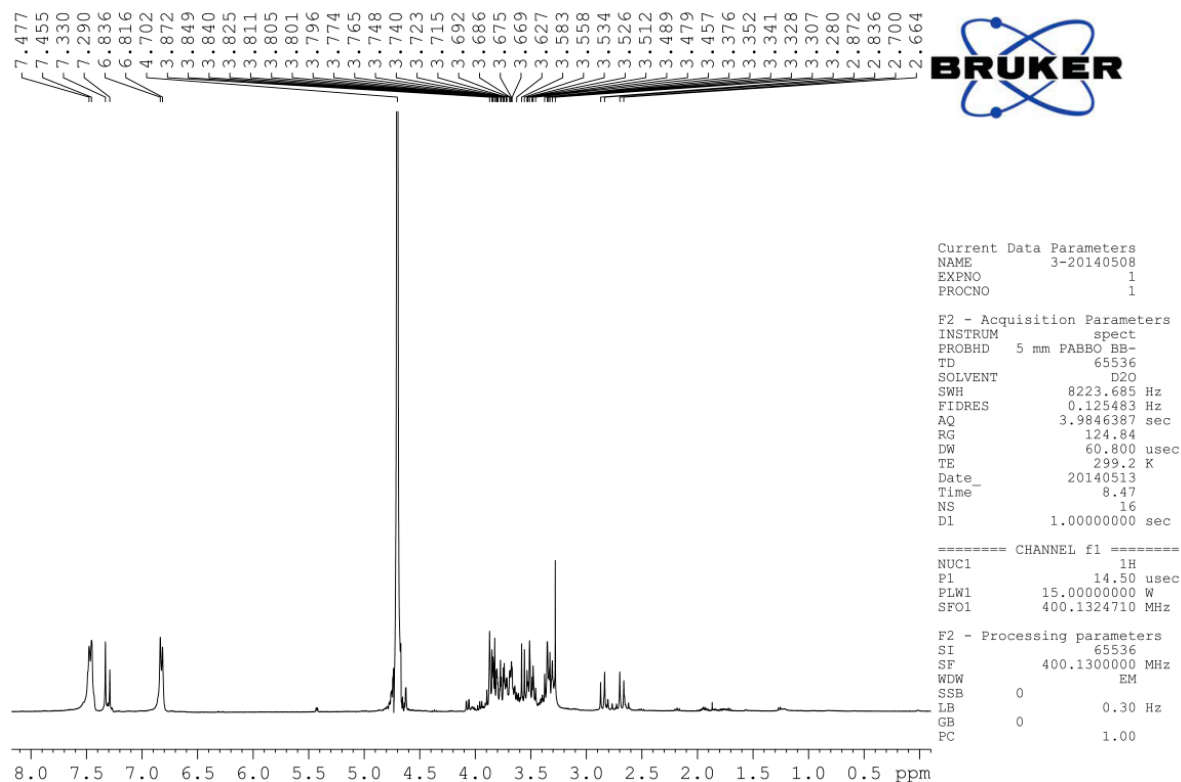Figure S14.  $^{13}\text{C-NMR}$  spectrum of hydroxysafflor yellow C (2) in  $\text{D}_2\text{O}$ .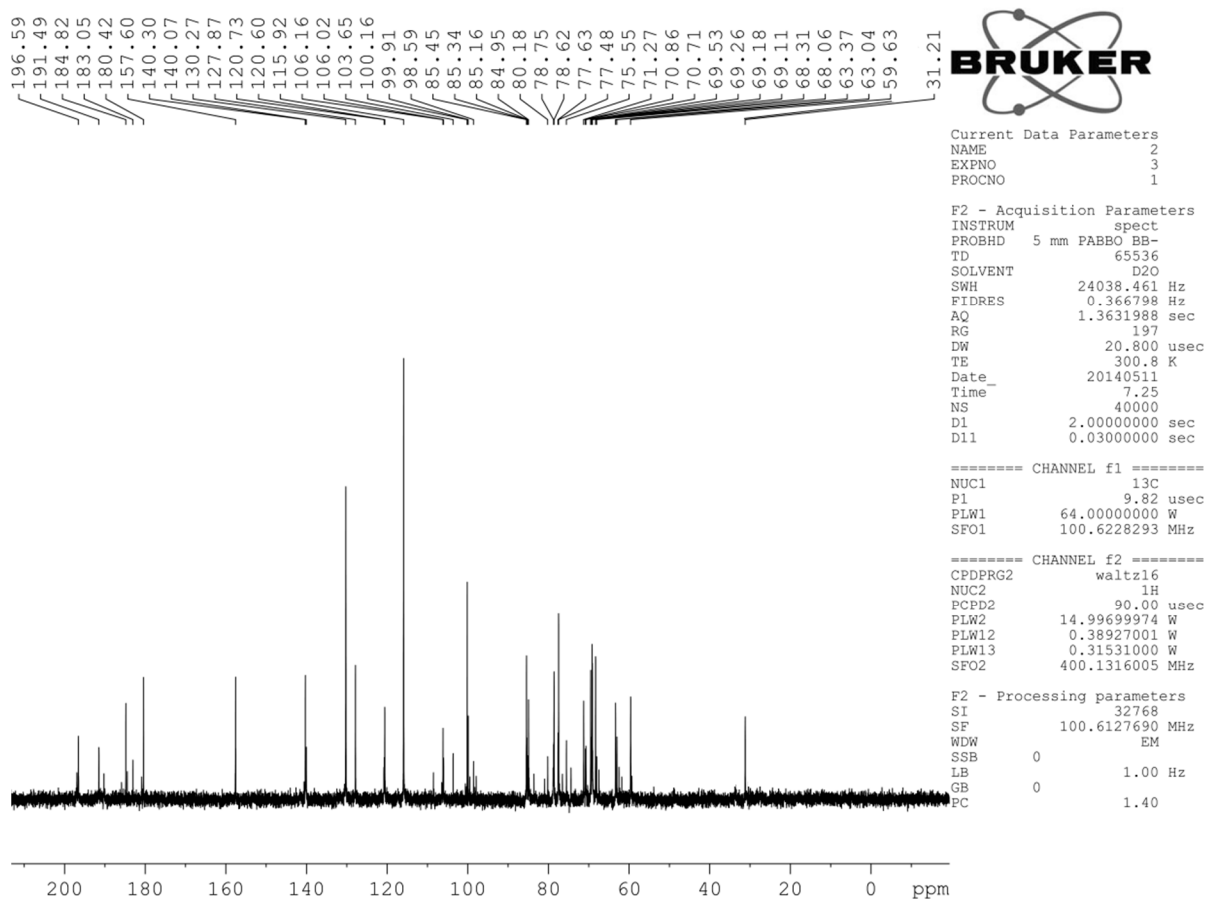

Figure S15. HSQC NMR spectrum of hydroxysafflor yellow C (2) in D<sub>2</sub>O.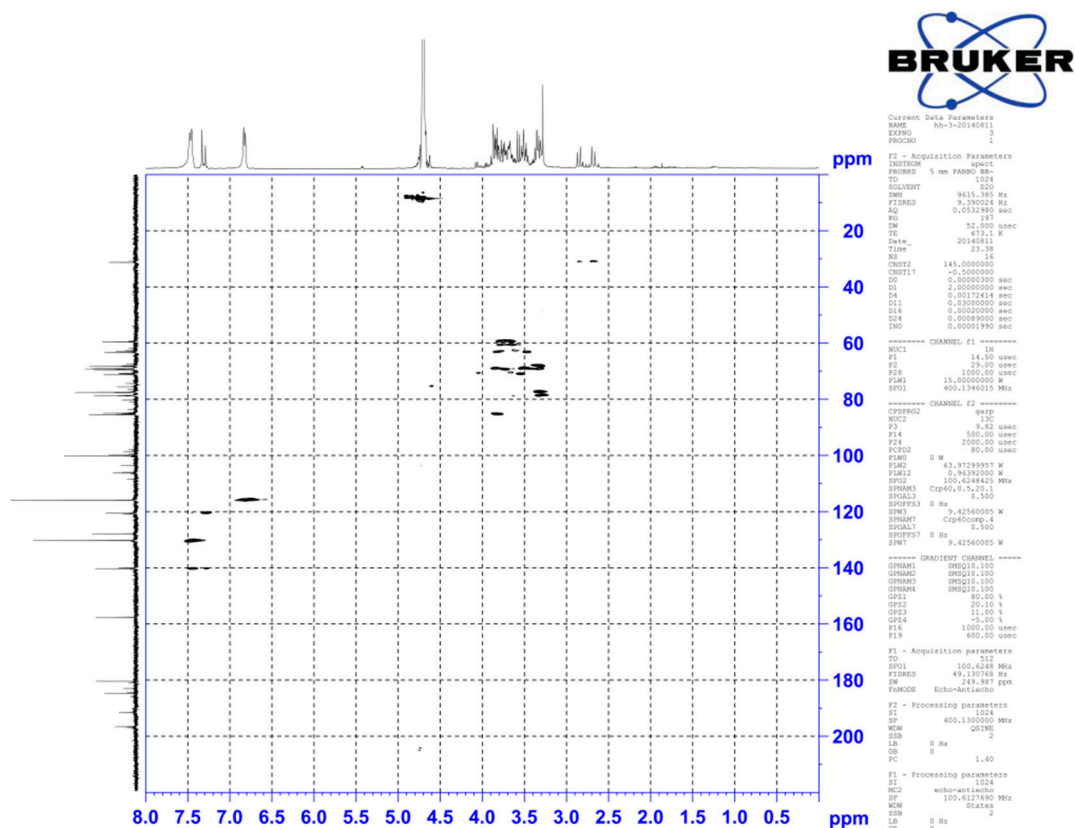Figure S16. COSY NMR spectrum of hydroxysafflor yellow C (2) in D<sub>2</sub>O.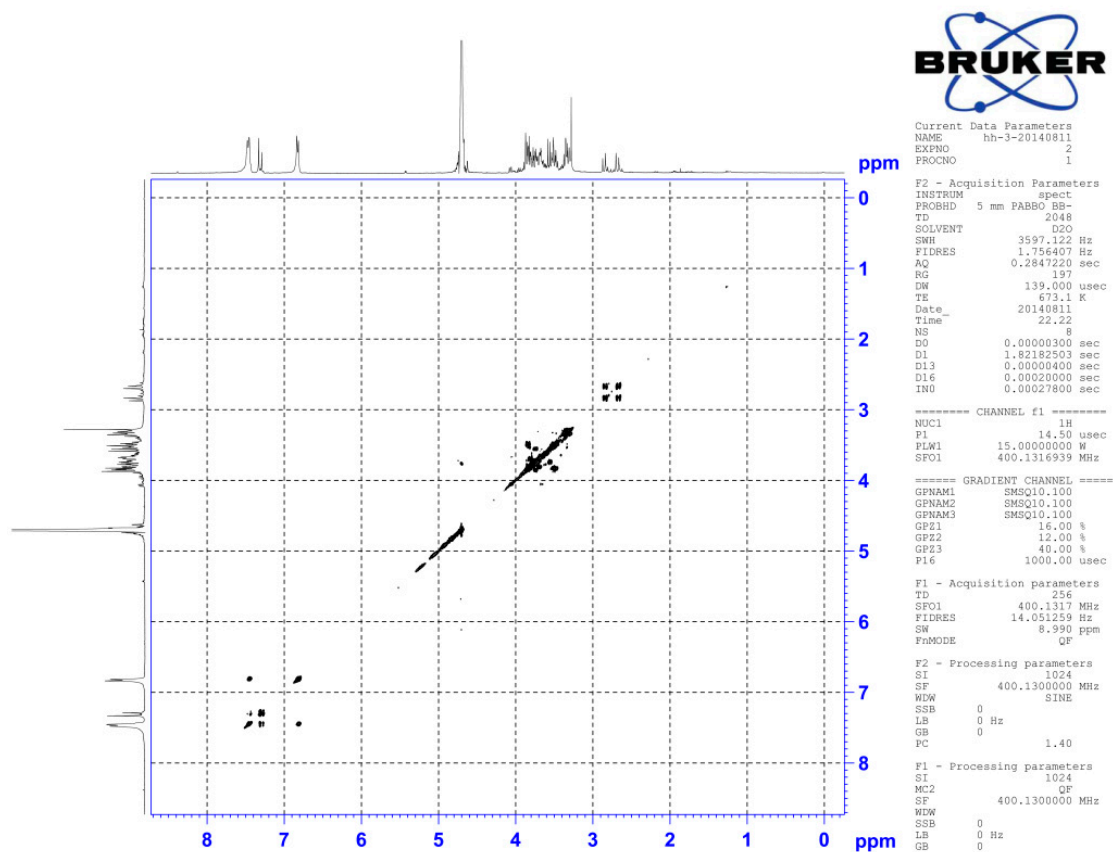



Figure S17.  $^1\text{H}$  NMR spectrum of saffloquinoside C (4) in  $\text{D}_2\text{O}$ .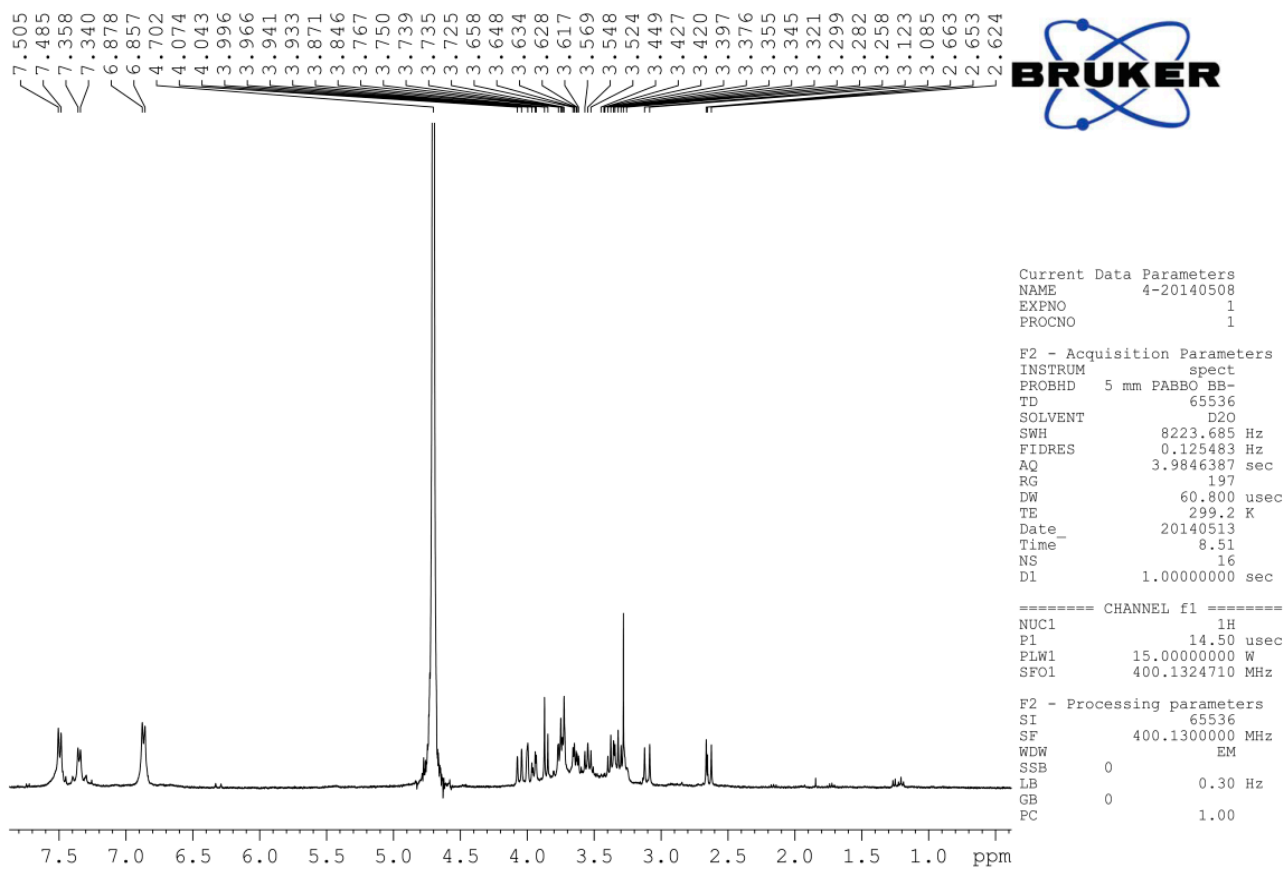

Supplement: ijms-15-16760-s001.pdf [file ijms-15-16760-s001.pdf]
